# Supplementary material for: Ultrafast and high efficiency photodegradation of dyes under visible light by Au nanocluster-promoted Zn0.5Cd0.5S nanorods
Source: Royal Society of Chemistry journal article supplement (doi:10.1039/d1ce00152c), 2021-01-01
Supplement: d1ce00152c1.pdf [file d1ce00152c1.pdf]

## Ultrafast and High Efficiency Photodegradation of Dyes under Visible Light by Au Nanoclusters Promoted $\text{Zn}_{0.5}\text{Cd}_{0.5}\text{S}$ Nanorods

Shuling Shen\*, Di Wang, Mengmeng Jia, Shuning Xiao, Zhihong Tang, Junhe Yang\*

*School of Materials Science and Engineering, University of Shanghai for Science and Technology, Shanghai, 200093, China*

E-mail: slshen@usst.edu.cn; jhyang@usst.edu.cn

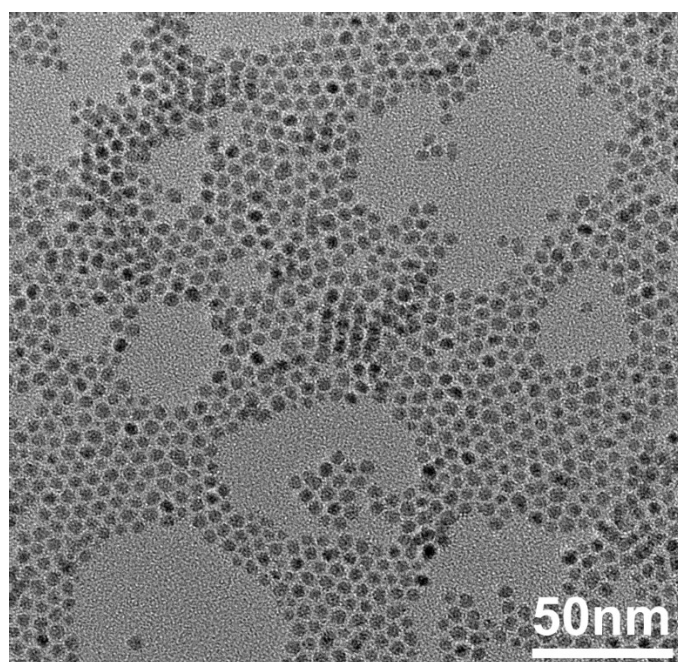

Figure S1 TEM image of Au nanoparticles with average diameter of 5 nm.

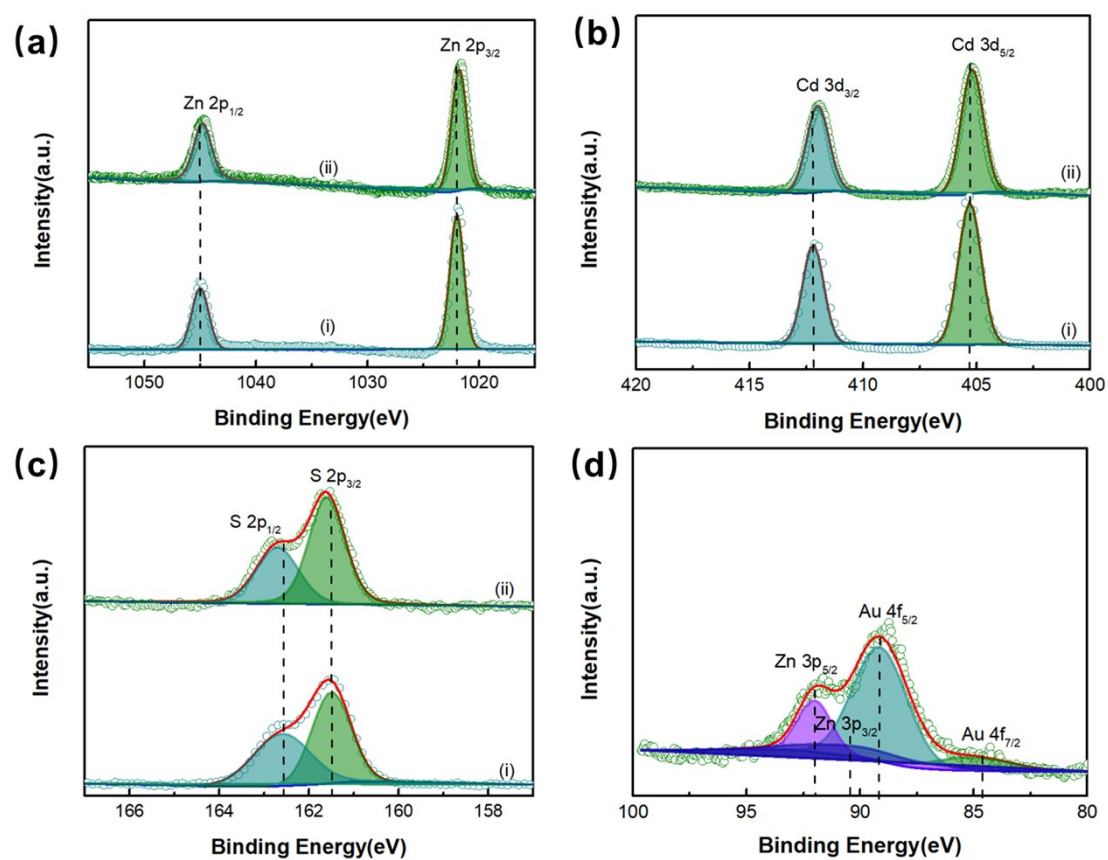

Figure S2 High-resolution XPS spectra of (a) Au 4f of Au/ZCS-2, (b) Zn 2p, (c) Cd 3d and (d) S 2p of ZCS (i) and Au/ZCS-2 (ii).

**Table S1.** Exponential fitting results for time resolved PL decay curves over ZCS and Au/ZCS-0.5 NRs.

| Sample     | $\tau_1$ (ns) | $A_1$ (%) | $\tau_2$ (ns) | $A_2$ (%) | $\tau_3$ (ns) | $A_3$ (%) | Lifetime (ns) |
|------------|---------------|-----------|---------------|-----------|---------------|-----------|---------------|
| ZCS        | 2.73          | 22.78     | 14.75         | 77.21     | -             | -         | 12.01         |
| Au/ZCS-0.5 | 3.07          | 4.88      | 16.51         | 38.51     | 78.77         | 56.61     | 51.09         |
